# Supplementary figures and images for: Developing Comprehensive Local Climate Zone Land Use Datasets for Advanced High-Resolution Urban Climate and Environmental Modeling
Source: MDPI journal article supplement (doi:10.3390/rs15123111), 2023-06-14

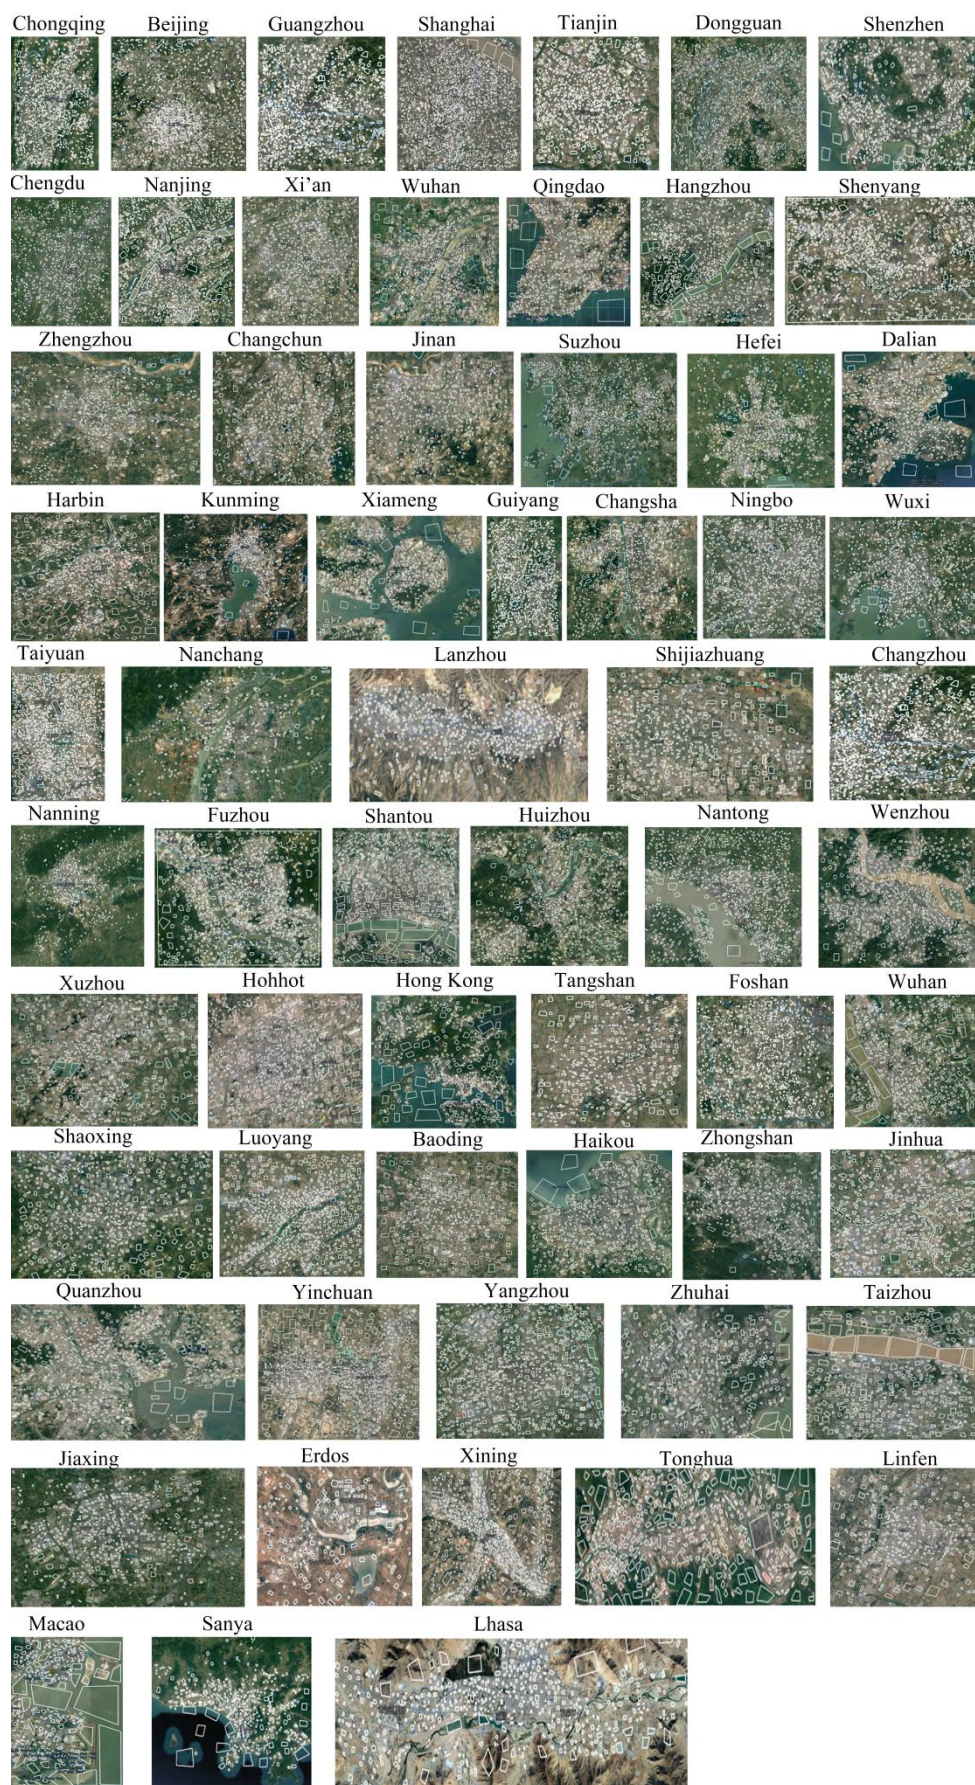

Figure S1 Training samples the 63 cities (The white boxes in the figure represent training samples)

Supplement: s1 [file s1]
